# Supplementary material for: Hydrogen bonds and halogen bonds in complexes of carbones L→C←L as electron donors to HF and ClF, for L = CO, N2, HNC, PH3, and SH2
Source: Royal Society of Chemistry journal article supplement (doi:10.1039/d0cp02009e), 2020-01-01
Supplement: d0cp02009e1.pdf [file d0cp02009e1.pdf]

# Hydrogen Bonds and Halogen Bonds in Complexes of Carbones $L \rightarrow C \leftarrow L$ as Electron Donors to HF and ClF, for $L = CO, N_2, HNC, PH_3,$ and $SH_2$

Janet E. Del Bene<sup>a\*</sup>

Department of Chemistry, Youngstown State University, Youngstown, Ohio 44555, USA

Ibon Alkorta<sup>b\*</sup> and José Elguero<sup>b</sup>

Instituto de Química Médica (IQM-CSIC), Juan de la Cierva, 3, E-28006 Madrid, Spain

|               |                                                                                                                                                                                                                                                                                                                                       |
|---------------|---------------------------------------------------------------------------------------------------------------------------------------------------------------------------------------------------------------------------------------------------------------------------------------------------------------------------------------|
| Pgs. S2-S3.   | Table S1. Structures ( $\text{\AA}$ , deg), total energies (au), and molecular graphs of complexes of $OC \rightarrow C \leftarrow CO$ with one and two HF and ClF molecules.                                                                                                                                                         |
| Pgs. S4-S5.   | Table S2. Structures ( $\text{\AA}$ , deg), total energies (au), and molecular graphs of complexes of $NN \rightarrow C \leftarrow NN$ with one and two HF and ClF molecules.                                                                                                                                                         |
| Pgs. S6-S7.   | Table S3. Structures ( $\text{\AA}$ , deg), total energies (au), and molecular graphs of complexes of $HNC \rightarrow C \leftarrow CNH$ with one and two HF and ClF molecules.                                                                                                                                                       |
| Pgs. S8-S9.   | Table S4. Structures ( $\text{\AA}$ , deg), total energies (au), and molecular graphs of complexes of $H_3P \rightarrow C \leftarrow PH_3$ with one and two HF and ClF molecules.                                                                                                                                                     |
| Pgs. S10-S11. | Table S5. Structures ( $\text{\AA}$ , deg), total energies (au), and molecular graphs of complexes of $H_2S \rightarrow C \leftarrow SH_2$ with one and two HF and ClF molecules.                                                                                                                                                     |
| Pgs. S12-S13  | Table S6. Paramagnetic spin orbit (PSO), diamagnetic spin orbit (DSO), Fermi contact (FC), and spin dipole (SD) components and total $^2hJ(F-C)$ (Hz) for coupling across hydrogen bonds in complexes with one and two HF molecules, and $^1xJ(Cl-C)$ (Hz) for coupling across halogen bonds in complexes with 1 and 2 ClF molecules. |

Table S1. Structures (Å, deg), total energies (au), and molecular graphs of complexes of  $\text{OC} \rightarrow \text{C} \leftarrow \text{CO}$  with one and two HF and ClF molecules.

|                                                                                     |                                                                                                                                                                                                                                                                                                                                                                        |
|-------------------------------------------------------------------------------------|------------------------------------------------------------------------------------------------------------------------------------------------------------------------------------------------------------------------------------------------------------------------------------------------------------------------------------------------------------------------|
| 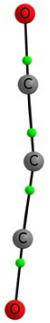   | <p>occo MP2= -264.29338266 NIMAG= 0<br/> C<br/> X,1,1.<br/> C,1,r1,2,a1<br/> C,1,r1,2,a1,3,180.,0<br/> O,1,r2,2,a2,4,180.,0<br/> O,1,r2,2,a2,3,180.,0<br/> <br/> r1=1.278099<br/> r2=2.448793<br/> a1=95.966<br/> a2=95.133</p>                                                                                                                                        |
| 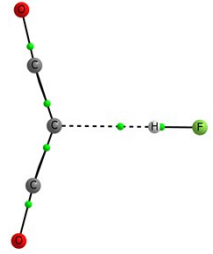   | <p>occo_hf_c2v MP2= -364.63865271 NIMAG= 0<br/> C,0,0,0,0.28834188<br/> C,0,1,2.2477998,0.70779174<br/> C,0,-1.22477998,0.70779174<br/> O,0,2.35481081,0.98938332<br/> O,0,-2.35481081,0.98938332<br/> H,0,0,-1.76735027<br/> F,0,0,-2.69848166</p>                                                                                                                    |
| 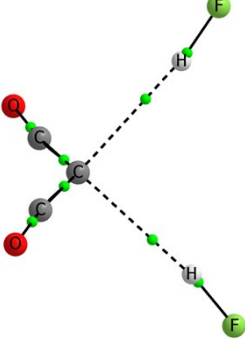  | <p>occo_2hf MP2= -464.98179312 NIMAG= 0<br/> C,0,0,0,0.3504254809<br/> C,0,1,2.032127612,0.8554973592<br/> C,0,-1.2032127612,0.8554973592<br/> O,0,2.3129354785,1.1951814587<br/> O,0,-2.3129354785,1.1951814587<br/> H,-1.5312063788,0,-1.0935531994<br/> H,1.5312063788,0,-1.0935531994<br/> F,-2.2943101987,0,-1.6232500574<br/> F,2.2943101987,0,-1.6232500574</p> |
| 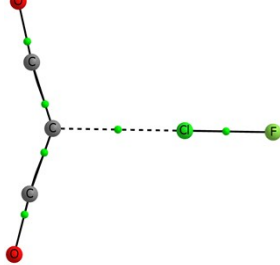 | <p>occo_clf MP2= -823.66354607 NIMAG= 0<br/> C,0,0,0,0.4392692222<br/> C,0,1,2.271109383,0.8555149771<br/> C,0,-1.2271109383,0.8555149771<br/> O,0,2.3587629508,1.1293137208<br/> O,0,-2.3587629508,1.1293137208<br/> Cl,0,0,-2.0601043485<br/> F,0,0,-3.7319622285</p>                                                                                                |

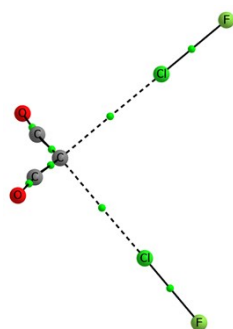

```

occoo_2clf MP2= -1383.03276020 NIMAG= 0
C,0.,0.,0.6226376912
C,0.,1.2176798287,1.0861864783
C,0.,-1.2176798287,1.0861864783
O,0.,2.3386460841,1.3893269997
O,0.,-2.3386460841,1.3893269997
Cl,-1.8632267091,0.,-1.167328749
Cl,1.8632267091,0.,-1.167328749
F,-3.0640898633,0.,-2.3154403102
F,3.0640898633,0.,-2.3154403102

```

Table S2. Structures (Å, deg), total energies (au), and molecular graphs of complexes of  $\text{NN} \rightarrow \text{C} \leftarrow \text{NN}$  with one and two HF and ClF molecules.

|                                                                                     |                                                                                                                                                                                                                                                                                                                                                                                                        |
|-------------------------------------------------------------------------------------|--------------------------------------------------------------------------------------------------------------------------------------------------------------------------------------------------------------------------------------------------------------------------------------------------------------------------------------------------------------------------------------------------------|
| 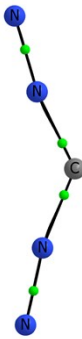   | <p>n2cn2 MP2= -256.56479818 NIMAG= 0<br/> C<br/> X,1,1.<br/> N,1,r1,2,a1<br/> N,1,r1,2,a1,3,180.,0<br/> N,1,r2,2,a2,4,180.,0<br/> N,1,r2,2,a2,3,180.,0<br/> <br/> r1=1.26707563<br/> r2=2.42717611<br/> a1=114.27859507<br/> a2=109.60147599</p>                                                                                                                                                       |
| 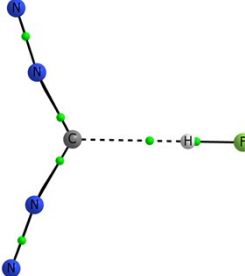   | <p>n2cn2_hf_c2v MP2= -356.91190534 NIMAG= 0<br/> C,0,0,0,0.12040519<br/> N,0,1.12833163,0.74731132<br/> N,0,-1.12833163,0.74731132<br/> N,0,2.21901314,1.12240416<br/> N,0,-2.21901314,1.12240416<br/> H,0,0,-1.84822557<br/> F,0,0,-2.78335803</p>                                                                                                                                                    |
| 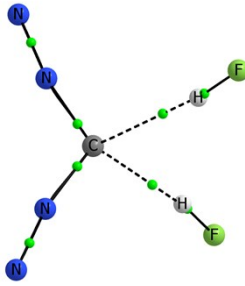 | <p>n2cn2_2hf MP2= -457.25669476 NIMAG= 0<br/> C,0.0000000348,0.23432971,0.<br/> N,0.0000001377,0.91712429,1.11636807<br/> N,0.0000001377,0.91712429,-1.11636807<br/> N,0.0000001999,1.32970398,2.18522301<br/> N,0.0000001999,1.32970398,-2.18522301<br/> H,-1.42190871,-1.18048332,0.<br/> H,1.4219083531,-1.1804837486,0.<br/> F,-2.20083722,-1.69447812,0.<br/> F,2.2008367081,-1.6944787834,0.</p> |
| 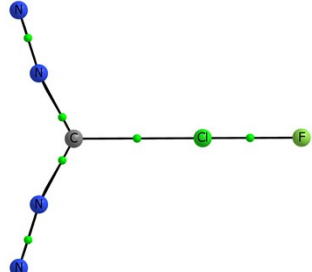 | <p>n2cn2_clf MP2= -815.94038615 NIMAG= 0<br/> C,0,0,0,0.3274875081<br/> N,0,1.1373100471,0.933216079<br/> N,0,-1.1373100471,0.933216079<br/> N,0,2.2356897269,1.2816031898<br/> N,0,-2.2356897269,1.2816031898<br/> Cl,0,0,-1.9074965694<br/> F,0,0,-3.6213769262</p>                                                                                                                                  |

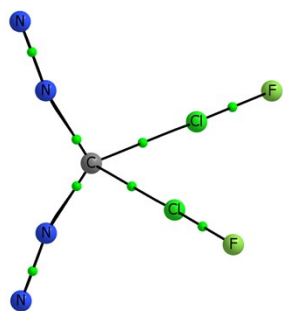

n2cn2\_2clf MP2= -1375.31392417 NIMAG= 0  
 C,0.0000000001,0.,0.3461521923  
 N,0.0000000001,1.1251504367,1.0186234049  
 N,0.0000000001,-1.1251504367,1.0186234049  
 N,0.0000000002,2.2063803792,1.3949269225  
 N,0.0000000002,-2.2063803792,1.3949269225  
 Cl,-1.8509820125,0.,-1.0505355792  
 Cl,1.8509820123,0.,-1.0505355796  
 F,-3.2272028758,0.,-2.0422253554  
 F,3.2272028753,0.,-2.0422253562

Table S3. Structures (Å, deg), total energies (au), and molecular graphs of complexes of  $\text{HNC} \rightarrow \text{C} \leftarrow \text{CNH}$  with one and two HF and ClF molecules.

|                                                                                     |                                                                                                                                                                                                                                                                                                                                                                                                                                                                                                                                 |
|-------------------------------------------------------------------------------------|---------------------------------------------------------------------------------------------------------------------------------------------------------------------------------------------------------------------------------------------------------------------------------------------------------------------------------------------------------------------------------------------------------------------------------------------------------------------------------------------------------------------------------|
| 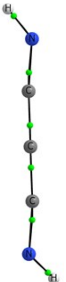   | <p>hncccnh MP2= -224.49828538 NIMAG= 0<br/> C,0,0,-0.0727410902<br/> C,-1.2777541366,0.015305167,0.0077287239<br/> C,1.2777541366,-0.015305167,0.0077287239<br/> N,-2.4959363321,-0.088106447,-0.0479416778<br/> N,2.4959363321,0.088106447,-0.0479416778<br/> H,-3.1391210905,0.4521763263,0.5140337039<br/> H,3.1391210905,-0.4521763263,0.5140337039</p>                                                                                                                                                                     |
| 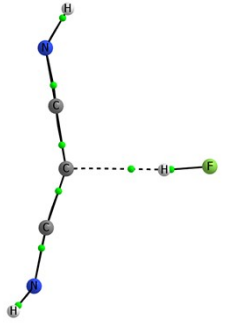   | <p>hncccnh_hf_2 MP2= -324.84631720 NIMAG= 0<br/> C,0.025855665,-0.3979920643,-0.0317893391<br/> C,0.1841603418,-0.6401983839,1.2290566534<br/> C,0.21511312,-0.7137646619,-1.2725233241<br/> N,0.2282660238,-0.9093448869,2.4105826751<br/> N,0.1795367962,-0.9170026582,-2.4689658497<br/> H,0.6329667368,-0.3835777431,3.1697390467<br/> H,0.9381958626,-1.1491725868,-3.0906529625<br/> H,-0.4561089312,1.5467894875,0.0446170894<br/> F,-0.6209856151,2.4611864976,0.1549360107</p>                                         |
| 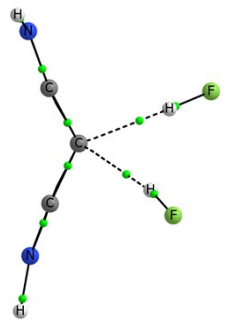  | <p>hncccnh_clf_cs MP2= -783.87597986 NIMAG= 0<br/> C,0.02688357,0.85464306,0.<br/> C,-0.02246988,1.3796153,1.20599586<br/> C,-0.02246988,1.3796153,-1.20599586<br/> N,0.08903734,1.73637556,2.34731754<br/> N,0.08903734,1.73637556,-2.34731754<br/> H,-0.56066104,1.93162951,3.09076707<br/> H,-0.56066104,1.93162951,-3.09076707<br/> Cl,0.00602361,-1.30361233,0.<br/> F,-0.01330197,-3.07334689,0.</p>                                                                                                                      |
| 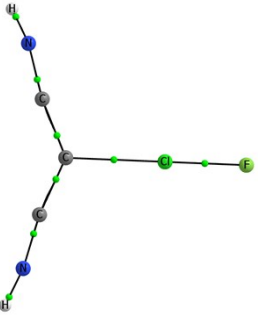 | <p>hncccnh_2hf MP2= -425.19351407 NIMAG= 0<br/> C,0.1694741939,0.4133533394,0.<br/> C,0.0681299915,0.9258423686,1.205488668<br/> C,0.0681299915,0.9258423686,-1.205488668<br/> N,0.1320682366,1.2910133393,2.3477813064<br/> N,0.1320682366,1.2910133393,-2.3477813064<br/> H,-0.5227183113,1.4396504955,3.0953767211<br/> H,-0.5227183113,1.4396504955,-3.0953767211<br/> H,1.3780930569,-1.1356032572,0.<br/> H,-1.3313288755,-0.9408341046,0.<br/> F,1.9905693891,-1.8448503324,0.<br/> F,-2.1548686351,-1.3836076298,0.</p> |

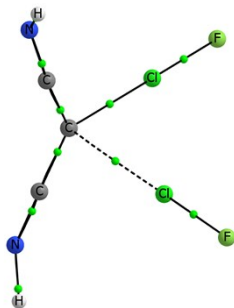

hncclh\_2clf MP2= -1343.24816531 NIMAG= 0  
 C,0.3357542363,0.5939811706,0.  
 C,0.1217887327,1.0867625783,1.2084329851  
 C,0.1217887327,1.0867625783,-1.2084329851  
 N,0.0996139036,1.4617184883,2.3427688888  
 N,0.0996139036,1.4617184883,-2.3427688888  
 H,-0.5275600911,1.4355898664,3.1281612559  
 H,-0.5275600911,1.4355898664,-3.1281612559  
 Cl,1.7702191452,-1.0960962607,0.  
 Cl,-1.7797177138,-0.8296738095,0.  
 F,2.9074618733,-2.4161139948,0.  
 F,-3.1690571101,-1.7666616793,0.

Table S4. Structures (Å, deg), total energies (au), and molecular graphs of complexes of  $\text{H}_3\text{P} \rightarrow \text{C} \leftarrow \text{PH}_3$  with one and two HF and ClF molecules.

|                                                                                     |                                                                                                                                                                                                                                                                                                                                                                                                                                                                                                                                                                             |
|-------------------------------------------------------------------------------------|-----------------------------------------------------------------------------------------------------------------------------------------------------------------------------------------------------------------------------------------------------------------------------------------------------------------------------------------------------------------------------------------------------------------------------------------------------------------------------------------------------------------------------------------------------------------------------|
| 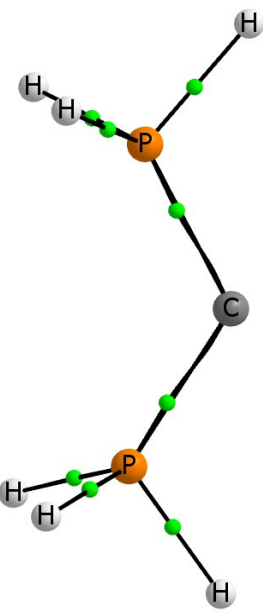   | <p>ph3cph3 MP2= -723.24780957 NIMAG= 0<br/> C<br/> X,1,1.<br/> P,1,r1,2,a1<br/> P,1,r1,2,a1,3,180.,0<br/> H,3,r2,1,a2,2,0.,0<br/> H,4,r2,1,a2,2,0.,0<br/> H,3,r3,1,a3,2,d3,0<br/> H,3,r3,1,a3,2,-d3,0<br/> H,4,r3,1,a3,2,d3,0<br/> H,4,r3,1,a3,2,-d3,0</p> <p>r1=1.65748192<br/> r2=1.40235366<br/> r3=1.42132697<br/> a1=119.87711784<br/> a2=112.22000049<br/> a3=121.80824346<br/> d3=117.38873328</p>                                                                                                                                                                   |
| 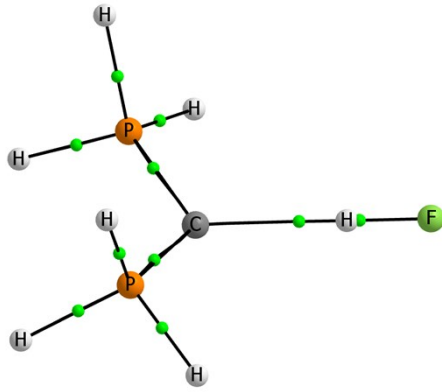  | <p>ph3cph3_hf MP2= -823.61200529 NIMAG= 0<br/> C,0.,-0.3319616825,-0.1966273382<br/> P,1.458436208,-0.0443277036,-0.9383488443<br/> P,-1.458436208,-0.0443277036,-0.9383488443<br/> H,2.5269454885,-0.138816188,-0.0390045554<br/> H,-2.5269454885,-0.138816188,-0.0390045554<br/> H,1.9400601182,-0.8814524035,-1.9754472824<br/> H,-1.7174967,1.211075746,-1.5397666355<br/> H,-1.7174967,1.211075746,-1.5397666355<br/> H,-1.9400601182,-0.8814524035,-1.9754472824<br/> H,0.,-1.4738086288,1.1148845846<br/> F,0.,-2.1038252147,1.847770359</p>                         |
| 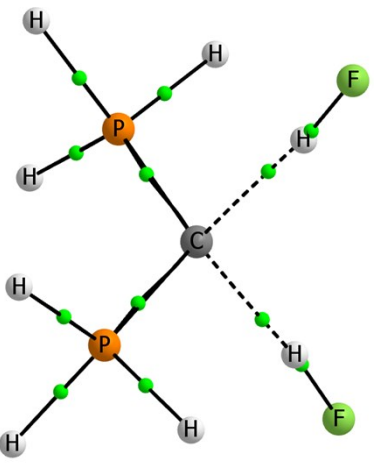 | <p>ph3cph3_hf2 MP2= -923.97263358 NIMAG= 0<br/> C,0.,0.,-0.0618881618<br/> P,1.4586416725,0.,-0.8875404704<br/> P,-1.4586416725,0.,-0.8875404704<br/> H,2.5366944211,0.,0.0018151859<br/> H,-2.5366944211,0.,0.0018151859<br/> H,1.7969573545,-1.080127172,-1.7323299583<br/> H,1.7969573545,1.080127172,-1.7323299583<br/> H,-1.7969573545,1.080127172,-1.7323299583<br/> H,-1.7969573545,-1.080127172,-1.7323299583<br/> H,0.,-1.4779508483,0.9342302452<br/> F,0.,-2.3277938952,1.3860682585<br/> H,0.,1.4779508483,0.9342302452<br/> F,0.,2.3277938952,1.3860682585</p> |

|  |                                                                                                                                                                                                                                                                                                                                                                                                                                                                                                                                                                                |
|--|--------------------------------------------------------------------------------------------------------------------------------------------------------------------------------------------------------------------------------------------------------------------------------------------------------------------------------------------------------------------------------------------------------------------------------------------------------------------------------------------------------------------------------------------------------------------------------|
|  | <p>ph3cph3_clf_cs MP2= -1282.66020425 NIMAG= 0<br/> C,-0.5702208707,0.7820187856,0.<br/> P,0.0877149421,1.2013921191,1.4940238996<br/> P,0.0877149421,1.2013921191,-1.4940238996<br/> H,-0.6418889533,0.5951188924,2.5189372346<br/> H,-0.6418889533,0.5951188924,-2.5189372346<br/> H,1.4091888811,0.823366933,1.8154764299<br/> H,0.0736271937,2.5629495925,1.8454539394<br/> H,0.0736271937,2.5629495925,-1.8454539394<br/> H,1.4091888811,0.823366933,-1.8154764299<br/> Cl,-0.1644036178,-1.22931212,0.<br/> F,0.2116043722,-3.0850092358,0.</p>                          |
|  | <p>ph3cph3_clf2 MP2= -1842.06423199 NIMAG= 0<br/> C,0.,0.,-0.197510476<br/> P,1.5473265889,0.,-0.9366014009<br/> P,-1.5473265889,0.,-0.9366014009<br/> H,2.4886749959,0.,0.0920023721<br/> H,-2.4886749959,0.,0.0920023721<br/> H,1.8634832179,-1.112175768,-1.7293150167<br/> H,1.8634832179,1.112175768,-1.7293150167<br/> H,-1.8634832179,1.112175768,-1.7293150167<br/> H,-1.8634832179,-1.112175768,-1.7293150167<br/> Cl,0.,-1.8044991034,0.7579002304<br/> F,0.,-3.4682002611,1.5930108333<br/> Cl,0.,1.8044991034,0.7579002304<br/> F,0.,3.4682002611,1.5930108333</p> |

Table S5. Structures (Å, deg), total energies (au), and molecular graphs of complexes of  $\text{H}_2\text{S} \rightarrow \text{C} \leftarrow \text{SH}_2$  with one and two HF and ClF molecules.

|                                                                                     |                                                                                                                                                                                                                                                                                                                                                                                                                                                                                                                                                                     |
|-------------------------------------------------------------------------------------|---------------------------------------------------------------------------------------------------------------------------------------------------------------------------------------------------------------------------------------------------------------------------------------------------------------------------------------------------------------------------------------------------------------------------------------------------------------------------------------------------------------------------------------------------------------------|
| 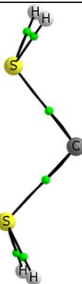   | <p>sh2csh2 MP2= -835.64105675 NIMAG= 0<br/> C,0.,0.,0.9156757047<br/> S,0.,1.321528952,-0.1985578964<br/> S,0.,-1.321528952,-0.1985578964<br/> H,-0.9564879678,2.1958664427,0.2168109512<br/> H,0.9564879678,-2.1958664427,0.2168109512<br/> H,0.9564879678,2.1958664427,0.2168109512<br/> H,-0.9564879678,-2.1958664427,0.2168109512</p>                                                                                                                                                                                                                           |
| 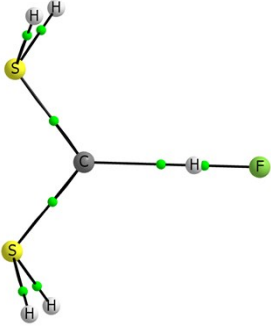   | <p>sh2csh2_hf MP2= -936.01013497 NIMAG= 0<br/> C,0.,0.,0.9640528482<br/> S,0.,1.3418492879,-0.0945105931<br/> S,0.,-1.3418492879,-0.0945105931<br/> H,-0.9617198222,2.1946574259,0.3453265972<br/> H,0.9617198222,-2.1946574259,0.3453265972<br/> H,0.9617198222,2.1946574259,0.3453265972<br/> H,-0.9617198222,-2.1946574259,0.3453265972<br/> H,0.,0.,2.6228632357<br/> F,0.,0.,3.6066024262</p>                                                                                                                                                                  |
| 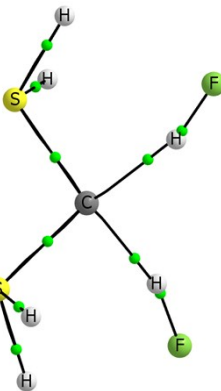  | <p>sh2csh2_2hf_2 MP2= -1036.37304874 NIMAG= 0<br/> C,0.,0.,0.1223139218<br/> S,1.342779589,0.2488535012,-0.9319605674<br/> S,-1.342779589,-0.2488535012,-0.9319605674<br/> H,1.9729297489,1.3313596823,-0.4158558868<br/> H,-1.9729297489,-1.3313596823,-0.4158558868<br/> H,2.3271173107,-0.5758722217,-0.4997453782<br/> H,-2.3271173107,0.5758722217,-0.4997453782<br/> H,-0.1990084851,-1.3265015897,1.1693142726<br/> H,0.1990084851,1.3265015897,1.1693142726<br/> F,-0.547177965,-2.1459717069,1.5655800979<br/> F,0.547177965,2.1459717069,1.5655800979</p> |
| 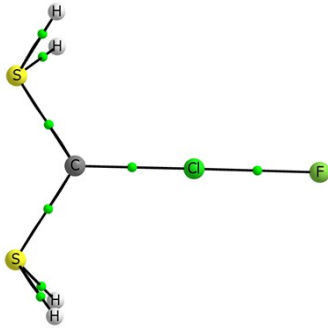 | <p>sh2csh2_clf_2_cs MP2= -1395.07297178 NIMAG= 0<br/> C,0.5410515897,-0.4385920457,0.<br/> S,1.385213613,0.0866048172,1.3952385412<br/> S,1.385213613,0.0866048172,-1.3952385412<br/> H,0.687808939,1.1415365109,1.9255657793<br/> H,0.8604759567,-0.7551203492,-2.3085802082<br/> H,0.8604759567,-0.7551203492,2.3085802082<br/> H,0.687808939,1.1415365109,-1.9255657793<br/> Cl,-1.2794012454,-0.1709949123,0.<br/> F,-3.2122183692,0.2215653473,0.</p>                                                                                                          |

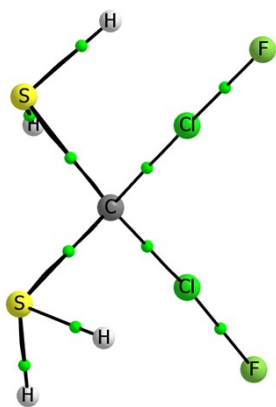

sh2csh2\_2clf\_2\_cs MP2= -1954.47793911 NIMAG= 0  
 C,-0.2777685223,0.0499668431,0.  
 S,-1.3187088323,-0.0673553052,-1.4708006374  
 S,-1.3187088323,-0.0673553052,1.4708006374  
 H,-1.2037371574,1.2074080245,-1.9201681324  
 H,-0.3239526424,-0.5464710293,2.246524511  
 H,-0.3239526424,-0.5464710293,-2.246524511  
 H,-1.2037371574,1.2074080245,1.9201681324  
 Cl,0.6029390113,-1.7281147203,0.  
 Cl,0.6265188278,1.7230393204,0.  
 F,1.4745926442,-3.3788087609,0.  
 F,1.4187797445,3.4468264846,0.

Table S6. Paramagnetic spin orbit (PSO), diamagnetic spin orbit (DSO), Fermi contact (FC), and spin-dipole (SD) components and total  $^2J(\text{F-C})$  (Hz) for coupling across hydrogen bonds in complexes with one and two HF molecules, and  $^1J(\text{Cl-C})$  (Hz) for coupling across halogen bonds in complexes with 1 and 2 ClF molecules.

| L = CO | PSO  | DSO | FC   | SD  | $^2J(\text{F-C})$  |
|--------|------|-----|------|-----|--------------------|
| HF     | -1.7 | 0.2 | 18.2 | 0.2 | 16.8               |
| 2HF    | -1.8 | 0.2 | 14.5 | 0.2 | 13                 |
|        |      |     |      |     |                    |
|        |      |     |      |     | $^1J(\text{Cl-C})$ |
| ClF    | 1.8  | 0   | 27.6 | 0.3 | 29.7               |
| 2ClF   | 1.6  | 0.1 | 22.4 | 0.3 | 24.3               |

| L = NN | PSO  | DSO | FC   | SD  | $^2J(\text{F-C})$  |
|--------|------|-----|------|-----|--------------------|
| HF     | -0.9 | 0.2 | 62.1 | 0.4 | 61.8               |
| 2HF    | -1.3 | 0.2 | 45.4 | 0.1 | 44.4               |
|        |      |     |      |     |                    |
|        |      |     |      |     | $^1J(\text{Cl-C})$ |
| ClF    | 1.3  | 0.1 | 64.6 | 0.1 | 66.1               |
| 2ClF   | 1.6  | 0.1 | 52.9 | 0.2 | 54.7               |

| L = HNC | PSO  | DSO | FC   | SD               | $^2J(\text{F-C})$  |
|---------|------|-----|------|------------------|--------------------|
| HF      | -2.1 | 0.1 | 19.1 | 0.2              | 17.3               |
| 2HF     | -2.0 | 0.2 | 37.2 | 0.1 <sup>a</sup> | 35.5               |
|         | -2.7 | 0.2 | 23.9 | 0.2 <sup>a</sup> | 21.5 <sup>b</sup>  |
|         |      |     |      |                  |                    |
|         |      |     |      |                  | $^1J(\text{Cl-C})$ |
| ClF     | 3.3  | 0.1 | 52.2 | 0.9              | 56.5               |
| 2ClF    | 2.9  | 0.1 | 53.2 | 0.9 <sup>a</sup> | 57.1               |
|         | 2.4  | 0.1 | 20.3 | 0.9 <sup>a</sup> | 23.7 <sup>b</sup>  |

| L = PH <sub>3</sub> | PSO  | DSO | FC   | SD  | <sup>2</sup> hJ(F-C)  |
|---------------------|------|-----|------|-----|-----------------------|
| HF                  | -2.8 | 0.3 | 139  | 0   | 136.5                 |
| 2HF                 | -3.7 | 0.3 | 98.5 | 0.8 | 95.2                  |
|                     |      |     |      |     |                       |
|                     |      |     |      |     | <sup>1</sup> xJ(C-Cl) |
| ClF                 | 7.7  | 0.1 | 33.7 | 3.3 | 44.8                  |
| 2ClF                | 4.8  | 0.1 | 46.8 | 2   | 53.7                  |

| L = SH <sub>2</sub> | PSO  | DSO | FC    | SD   | <sup>2</sup> hJ(F-C)  |
|---------------------|------|-----|-------|------|-----------------------|
| HF                  | 0.0  | 0.3 | 289.2 | 0.8  | 290.3                 |
| 2HF                 | -1.5 | 0.3 | 166.4 | -0.9 | 164.3                 |
|                     |      |     |       |      |                       |
|                     |      |     |       |      | <sup>1</sup> xJ(C-Cl) |
| ClF                 | -0.8 | 0.1 | 3.6   | 0.6  | 3.5                   |

- a) Estimated.  
b) For the interaction at the longer intermolecular distance.
